# Supplementary material
Source: Springer Nature journal article supplement (https://www.springermedizin.de/resource/supplementary/12885_2008_1400_MOESM7_ESM.pdf/9473032)

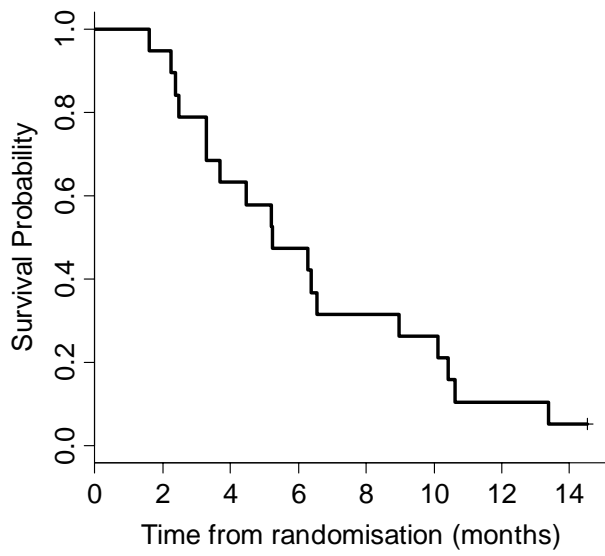

**Median survival (from randomisation) 5.2 months (95% CI 3.3 to 9 months)**

| Numbers at risk (months) |  | 0  | 3  | 6 | 9 | 12 |
|--------------------------|--|----|----|---|---|----|
|                          |  | 19 | 17 | 9 | 5 | 2  |

Supplement: MOESM7 [file 9473032]
